# Supplementary material for: Development of the “Highly Sensitive Dog” questionnaire to evaluate the personality dimension “Sensory Processing Sensitivity” in dogs
Source: PubMed Central journal article supplement (PMC5433715; doi:10.1371/journal.pone.0177616), 2017-05-16
Supplement: pone.0177616.s002.pdf [file pone.0177616.s002.pdf]

**S2 Appendix - The Highly Sensitive Dog Questionnaire with original sources of questions**

(the numbers under each source refer to question numbers in the corresponding original questionnaire)

| Number | Question                                                                                                                                                                                                               | Neuroticism (N)<br>Fearfulness (F) | HSC<br>[85] | HSP<br>[57]          | Interview | Monash<br>[78] | C-BFI<br>[86] | PANAS<br>[79] | Impulsivity<br>[77] | Guide dogs<br>[34] |
|--------|------------------------------------------------------------------------------------------------------------------------------------------------------------------------------------------------------------------------|------------------------------------|-------------|----------------------|-----------|----------------|---------------|---------------|---------------------|--------------------|
| 1      | My dog is easily stressed, is easily overwhelmed by situations.                                                                                                                                                        |                                    | 19          | 1,7,9,14,16,19,23,25 | x         |                | 9R            |               |                     |                    |
| 2      | My dog notices small changes.                                                                                                                                                                                          |                                    | 20          | 2,22                 |           |                |               |               |                     |                    |
| 3      | My dog startles easily                                                                                                                                                                                                 | N                                  | 1           | 13                   |           |                |               | 3             |                     |                    |
| 4      | My dog is fearful                                                                                                                                                                                                      | F                                  |             |                      |           |                |               | 1R            |                     |                    |
| 5      | My dog is obviously startled by loud or unexpected sounds.                                                                                                                                                             | F                                  |             |                      |           |                |               |               |                     | x                  |
| 6      | My dog gets nervous quickly or is often nervous.                                                                                                                                                                       | N                                  |             |                      |           | N              | 39            |               |                     |                    |
| 7      | My dog seems to absorb everything that is happening around him/her.                                                                                                                                                    |                                    |             |                      | x         |                |               |               |                     |                    |
| 8      | My dog reacts when we argue at home.                                                                                                                                                                                   |                                    | 15          | 18,25                | x         |                | 34R           |               |                     |                    |
| 9      | My dog tends to be uncertain and/or careful.                                                                                                                                                                           | N                                  |             |                      |           | N              | 8R            |               |                     |                    |
| 10     | my dog is submissive                                                                                                                                                                                                   | N                                  |             |                      |           | N              |               |               |                     |                    |
| 11R    | My dog is emotionally stable, i.e. he is mostly even-tempered and not easily unnerved.                                                                                                                                 |                                    |             |                      |           |                | 24            |               |                     |                    |
| 12     | My dog has a tendency to be mistrustful                                                                                                                                                                                |                                    |             |                      | x         |                | 22R           |               |                     |                    |
| 13     | My dog is obviously startled by odd or unexpected things or objects.                                                                                                                                                   | F                                  |             |                      |           |                |               |               |                     | x                  |
| 14     | My dog tends to be restless.                                                                                                                                                                                           |                                    |             | 11                   |           | E              | 9R,21R        | 13R           |                     |                    |
| 15R    | My dog easily adapts to a new environment and can relax there                                                                                                                                                          |                                    |             |                      |           |                |               | 10            | 11R                 |                    |
| 16     | My dog has a subtle perception, i.e. he notices a lot or almost everything.                                                                                                                                            |                                    | 5           | 15                   | x         |                |               |               |                     |                    |
| 17     | My dog has problems adapting to changes in every day life (e.g. changes in routine, visitors, etc) and/or bigger changes in life, e.g. change of partner, rearranging furniture, going on holidays, moving home, etc.) |                                    | 11          | 21                   |           |                |               | 15R,21        |                     |                    |
| 18     | My dog reacts to small changes in voice, i.e. changes in intonation and volume.                                                                                                                                        |                                    |             |                      | x         |                |               |               |                     |                    |
| 19     | It takes a long time for my dog to calm down after an arousing event.                                                                                                                                                  |                                    | 10          | 11                   |           |                |               | 6             | 13                  |                    |
| 20     | My dog is anxious or uneasy in new situations.                                                                                                                                                                         | F                                  |             |                      |           |                |               |               |                     | x                  |
| 21     | My dog has trouble when people touch him and/or when things touch him/her (e.g. harness, coat, wet leaves, etc.)                                                                                                       |                                    | 2,12        |                      | x         |                |               |               | 4                   |                    |
| 22     | My dog is reactive, i.e. he quickly perceives small stimuli and reacts quickly and/or strongly to them.                                                                                                                |                                    |             |                      | x         |                |               |               | 16                  |                    |
| 23     | My dog is attentive.                                                                                                                                                                                                   |                                    |             |                      |           | T              | 5R            |               |                     |                    |
| 24     | My dog seems thoughtful.                                                                                                                                                                                               |                                    |             |                      |           |                | 15            |               |                     |                    |
| 25     | My dog observes everything that is happening around him.                                                                                                                                                               |                                    |             |                      | x         |                | 5R            |               |                     |                    |
| 26     | My dog is always on the alert                                                                                                                                                                                          |                                    |             |                      | x         |                |               |               |                     |                    |
| 27R    | My dog is generally relaxed, can cope well with stress.                                                                                                                                                                |                                    |             |                      |           | A              | 9             | 13            |                     |                    |
| 28     | My dog has problems when he is left alone outside and I move out of sight.                                                                                                                                             |                                    |             |                      | x         |                |               |               |                     |                    |
| 29     | My dog reacts strongly to punishment.                                                                                                                                                                                  |                                    | 4           |                      |           |                |               |               |                     |                    |
| 30     | My dog is very impulsive, i.e. s/he has sudden, strong urges to act, acts without forethought, is impatient.                                                                                                           | *                                  |             |                      |           |                |               |               | 3                   |                    |
| 31R    | my dog is biddable.                                                                                                                                                                                                    |                                    |             |                      |           | A              |               |               |                     |                    |
| 32     | My dog is sensitive                                                                                                                                                                                                    | N                                  |             | 27                   |           | N              |               |               |                     |                    |
| 33     | My dog is demanding                                                                                                                                                                                                    |                                    | 13          |                      | x         |                |               |               |                     |                    |
| 34     | My dog is emotional, i.e. reacts strongly to positive and/or negative events.                                                                                                                                          |                                    | 23          |                      | x         |                | 24R           |               |                     |                    |
| 35     | My dog is timid.                                                                                                                                                                                                       | *                                  | 27          |                      |           | N              | 31            |               |                     |                    |
| 36     | My dog needs a sense of security.                                                                                                                                                                                      |                                    |             |                      | x         |                |               |               |                     |                    |
| 37     | My dog backs away from or is reluctant to pass objects on the street (such as collecting boxes, bin bags or children's ride-on toys).                                                                                  | F                                  |             |                      |           |                |               |               |                     | x                  |
| 38     | My dog is easily excitable be it through positive or negative stimuli.                                                                                                                                                 |                                    |             |                      |           | E              |               | 7             | 18                  |                    |
| 39     | My dog is intelligent                                                                                                                                                                                                  |                                    | 6,17        |                      |           | T              |               |               |                     |                    |
| 40     | My dog reacts strongly to visual stimuli.                                                                                                                                                                              |                                    | 7           |                      |           |                |               |               |                     |                    |
| 41R    | My dog is rarely frightened                                                                                                                                                                                            | F, N                               |             |                      |           | NR             |               | 1             |                     |                    |
| 42     | My dog has a specific fear or phobia                                                                                                                                                                                   | F                                  |             |                      |           |                |               | 8             |                     |                    |

grey shading = questions added to HSD questionnaire, which were either not significantly different or not included in the pilot study, numbers refer to question in corresponding questionnaire

Monash Questionnaire [78]: E = extraversion, M = motivation/self-assuredness, N = neuroticism, T = training focus, A = amicability

\* questions originally added to the questionnaire, but not analyzed

R = questions with reversed scoring
