# Supplementary material for: Development of the “Highly Sensitive Dog” questionnaire to evaluate the personality dimension “Sensory Processing Sensitivity” in dogs
Source: PLoS One. 2017 May 16;12(5):e0177616. doi: 10.1371/journal.pone.0177616 (PMC5433715; doi:10.1371/journal.pone.0177616)
Supplement: S1 Appendix — (PDF) [file pone.0177616.s001.pdf]

**S1 Appendix - The original 112 questions of the pilot study with sources**

|     | Questions German                                                                                                                                                   | English translation of questions                                                                                                         | Source                                                          |
|-----|--------------------------------------------------------------------------------------------------------------------------------------------------------------------|------------------------------------------------------------------------------------------------------------------------------------------|-----------------------------------------------------------------|
| 1   | Mein Hund ist anhänglich, d.h. er ist generell dort, wo ich auch bin.                                                                                              | My dog is clingy, he usually is where I am.                                                                                              | Interview                                                       |
| 2   | Mein Hund ist aufdringlich.                                                                                                                                        | My dog is pushy.                                                                                                                         | Interview                                                       |
| 3   | Mein Hund beobachtet alles, was um ihn herum geschieht.                                                                                                            | My dog observes everything that is happening around him.                                                                                 | Interview, PANAS (5R)                                           |
| 4   | Mein Hund braucht viel Ruhe / Erholungszeit.                                                                                                                       | My dog needs a lot of peace and quiet, time to recover.                                                                                  | HSP-Q (5)                                                       |
| 5   | Mein Hund braucht körperliche Nähe.                                                                                                                                | My dog needs physical proximity.                                                                                                         | Interview                                                       |
| 6   | Mein Hund braucht Sicherheit.                                                                                                                                      | My dog needs a sense of security.                                                                                                        | Interview                                                       |
| 7   | Mein Hund ist draufgängerisch, mutig.                                                                                                                              | My dog is ballsy, courageous.                                                                                                            | Interview                                                       |
| 8   | Mein Hund ist emotional, reagiert auf positive und/oder negative Ereignisse stark.                                                                                 | My dog is emotional, i.e. reacts strongly to positive and/or negative events.                                                            | Interview, HSC-Q (23), C-BFI (24R)                              |
| R9  | Mein Hund ist eher extrovertiert.                                                                                                                                  | My dog is rather extroverted.                                                                                                            | Interview                                                       |
| 10  | Mein Hund ist eher introvertiert.                                                                                                                                  | My dog is rather introverted.                                                                                                            | Interview                                                       |
| 11  | Mein Hund ist fordernd.                                                                                                                                            | My dog is demanding                                                                                                                      | Interview, HSC-Q (13)                                           |
| 12  | Mein Hund ist frech.                                                                                                                                               | my dog is cheeky                                                                                                                         | Interview                                                       |
| R13 | Mein Hund ist eher geduldig.                                                                                                                                       | My dog is rather patient.                                                                                                                | I-Q (17R)                                                       |
| 14  | Mein Hund ist schnell "hyperig".                                                                                                                                   | My dog is "hyper" quickly.                                                                                                               | Interview, Monash (E)                                           |
| 15  | Mein Hund reagiert impulsiv.                                                                                                                                       | My dog reacts impulsively                                                                                                                | Impulsivity-Q (3)                                               |
| 16  | Mein Hund beobachtet und wartet im Allgemeinen, bevor er handelt.                                                                                                  | my dog general observes and watches, before he acts.                                                                                     | HSC-Q (21), I-Q (7R)                                            |
| 17  | Mein Hund ist interessiert.                                                                                                                                        | My dog is interested                                                                                                                     | HSC-Q                                                           |
| 18  | Mein Hund ist liebesbedürftig.                                                                                                                                     | My dog is needy of love.                                                                                                                 | Interview                                                       |
| 19  | Mein Hund ist tendenziell misstrauisch                                                                                                                             | My dog has a tendency to be mistrustful                                                                                                  | Interview, C-BFI (22R)                                          |
| 20  | Mein Hund reagiert darauf, wenn wir zuhause streiten.                                                                                                              | My dog reacts when we argue at home.                                                                                                     | Interview, HSC-Q (15), HSP-Q (18, 25), C-BFI (34R)              |
| 21  | Mein Hund ist reaktiv, d.h. er nimmt geringe Reize generell schnell wahr und reagiert schnell und/oder stark darauf                                                | My dog is reactive, i.e. he quickly perceives small stimuli and reacts quickly and/or strongly to them.                                  | Interview, I-Q (16)                                             |
| 22  | Mein Hund ist schreckhaft.                                                                                                                                         | My dog startles easily                                                                                                                   | HSC-Q (1), HSP-Q (13), PANAS (3)                                |
| 23  | Mein Hund ist sensibel.                                                                                                                                            | My dog is sensitive                                                                                                                      | HSP-Q (27), Monas (N)                                           |
| 24  | Mein Hund ist verschmust.                                                                                                                                          | my dog is cuddly                                                                                                                         | Interview                                                       |
| 25  | Mein Hund hat "die Antennen immer ausgefahren"                                                                                                                     | My dog always "has his antennae up", is always on the alert                                                                              | Interview                                                       |
| 26  | Mein Hund hat eine feine Wahrnehmung, nimmt viel oder fast alles wahr.                                                                                             | My dog has a subtle perception, i.e. he notices a lot or almost everything.                                                              | Interview, HSC-Q (5), HSP-Q (15)                                |
| 27  | Mein Hund kommuniziert auf eine feine Art und Weise mit mir, anderen Personen und/oder Hunden.                                                                     | my dog communicates in a gentle way with me, other people and/or other dogs.                                                             | Interview                                                       |
| 28  | Mein Hund scheint alles, was um ihn herum läuft, aufzusaugen.                                                                                                      | My dog seems to absorb everything that is happening around him.                                                                          | Interview                                                       |
| 29  | Mein Hund übernimmt die Emotionen anderer, reagiert auf meine Stimmung und/oder die Stimmung anderer.                                                              | My dog takes on my emotions, reacts to my mood or that of others.                                                                        | Interview, HSC-Q (15), HSP-Q (3), C-BFI (37)                    |
| 30  | Mein Hund reagiert stark auf Bestrafung                                                                                                                            | My dog reacts strongly to punishment.                                                                                                    | HSC-Q (4)                                                       |
| 31  | Mein Hund reagiert schon auf geringe Veränderungen der Stimme / Intonation / Lautstärke der Stimme.                                                                | My dog reacts to small changes in voice, i.e. changes in intonation and volume.                                                          | Interview                                                       |
| 32  | Mein Hund braucht viel Zeit, bis er zu jemandem Vertrauen fasst.                                                                                                   | My dog takes his time to trust somebody.                                                                                                 | HSC-Q (21), C-BFI (22R)                                         |
| 33  | Mein Hund verträgt Hitze schlecht.                                                                                                                                 | My dog has trouble tolerating heat.                                                                                                      | Interview                                                       |
| 34  | Mein Hund verträgt Kälte schlecht.                                                                                                                                 | My dog has trouble tolerating cold.                                                                                                      | Interview                                                       |
| 35  | Mein Hund hat Mühe mit Veränderungen im Alltag, im Tagesablauf und/oder Lebensveränderungen (z.B. veränderte Routine, Besuch, Partnerwechsel, Ferien, Umzug, etc.) | My dog has problems adapting to changes in every day life (e.g. changes in routine, visitors, change of partner, vacation, moving, etc.) | HSC-Q (11), HSP-Q (21), PANAS (15R,21)                          |
| 36  | Mein Hund braucht lange, bis er sich nach einer Erregung erholt und wieder "oben runter" kommt.                                                                    | It takes a long time for my dog to calm down after an arousing event.                                                                    | HSC-Q (10), HSP-Q (11), PANAS (6), I-Q (13)                     |
| R37 | Mein Hund hat eine gute Konzentrationsfähigkeit.                                                                                                                   | My dog 's a good power of concentration.                                                                                                 | Interview, HSC-Q (22R), HSP-Q (26), C-BFI (42R), I-Q (12)       |
| R38 | Mein Hund kann sich lange konzentrieren.                                                                                                                           | My dog has a good concentration span.                                                                                                    | Interview, C-BFI (42R), I-Q (12)                                |
| R39 | Mein Hund kann sich schnell an eine neue Umgebung gewöhnen und sich dort entspannen.                                                                               | My dog easily adapts to a new environment and can relax there                                                                            | PANAS (10), I-Q (11R)                                           |
| 40a | Mein Hund ist leicht gestresst, ist schnell mit Situationen überfordert                                                                                            | My dog is easily stressed , easily overwhelmed by situations.                                                                            | Interview, HSC-Q (19), HSP-Q (1,7,9,14,16,19,23,25), C-BFI (9R) |
| 41  | Mein Hund initiiert häufig Spiele mit anderen Hunden und/oder Menschen.                                                                                            | My dog often initiates play with other dogs or people                                                                                    | Interview                                                       |
| 42  | Mein Hund hat eine sanfte Art des Umgangs / der Kommunikation / des Spielens mit anderen Hunden und/oder Menschen.                                                 | My dog has a gentle way of communicating/playing with other dogs and / or people.                                                        | Interview, HSC-Q (16)                                           |
| R43 | Mein Hund entspannt sich schnell im Auto und kann dort auch schlafen.                                                                                              | My dog relaxed quickly in the car and can sleep.                                                                                         | Interview                                                       |
| 44  | Mein Hund ist in Menschenmengen eher angespannt, nervös, zeigt Anzeichen von Stress.                                                                               | My dog is rather tense, nervous and shows signs of stress in crowds                                                                      | PANAS (10)                                                      |
| 45  | Mein Hund ist eher schmerzempfindlich, "es Mimösli".                                                                                                               | my dog is sensitive to pain.                                                                                                             | HSC-Q (18), HSP-Q (4)                                           |
| 46a | Mein Hund hat Mühe damit, wenn ihn Leute anfassen und/oder wenn ihn etwas berührt (z.B. Gständli, Mantel, nasse Blätter, etc.).                                    | My dog has trouble when people touch him and/or when things touch him/her (e.g. harness, coat, wet leaves, etc.)                         | Interview, HSC-Q (2,12), I-Q (4)                                |
| 47  | Mein Hund reagiert stark auf Geräusche.                                                                                                                            | my dog reacts strongly to sounds.                                                                                                        | HSC-Q (19), HSP-Q (7,9,25), PANAS (12)                          |
| 48  | Mein Hund reagiert stark auf visuelle Reize.                                                                                                                       | my dog reacts strongly to visual stimuli                                                                                                 | HSP-Q (7)                                                       |
| 49  | Mein Hund reagiert stark auf Gerüche.                                                                                                                              | my dog reacts strongly to smells                                                                                                         | HSC-Q (7), HSP-Q (7)                                            |

|      | Questions German                                                                                                                                 | English translation of questions                                                                                 | Source                                               |
|------|--------------------------------------------------------------------------------------------------------------------------------------------------|------------------------------------------------------------------------------------------------------------------|------------------------------------------------------|
| 50   | Mein Hund bemerkt kleine Veränderungen.                                                                                                          | my dog notices small changes.                                                                                    | HSC-Q (20), HSP-Q (2,22)                             |
| 51   | Mein Hund mag es nicht, manipuliert zu werden (z.B. beim Tierarzt oder wenn ich eine Zecken entfernen oder Ohrentropfen verabreichen muss)       | my dog does not like to be manipulated (e.g. at the vet's or when I need to remove a tic or give him ear drops)  | Interview, I-Q (4)                                   |
| 52   | Mein Hund hat Mühe damit, wenn ich ihn draussen warten lasse und mich ausser Sichtweite begebe.                                                  | My dog has problems when he is left alone outside and I move out of sight.                                       | Interview                                            |
| 53   | Mein Hund hilft es, wenn ich ihm in für ihn schwierigen Situationen sage, was er tun soll, anstatt die Situation "selbst in die Hand zu nehmen". | It helps my dog when I tell him what to do in difficult situations instead of "taking on the situation" himself. | Interview                                            |
| 54   | Mein Hund bleibt erstmals auf Distanz und beobachtet, wenn er mit etwas Neuem konfrontiert wird.                                                 | My dog initially stays at a distance and observes when he is confronted with something new.                      | HSC-Q (21), I-Q (7R)                                 |
| 55   | Mein Hund ist aggressiv.                                                                                                                         | My dog is aggressive                                                                                             | Monash (A)/R, I-Q (5,9)                              |
| 56   | Mein Hund ist ängstlich.                                                                                                                         | my dog is fearful                                                                                                | Monash (N), PANAS (1R)                               |
| 57   | Mein Hund ist aktiv, braucht Bewegung, hat viel Energie, ist lebhaft.                                                                            | my dog is active, needs a lot of exercise, has a lot of energy, is lively.                                       | Monash (E), PANAS (11,20), C-BFI (11)                |
| 58   | Mein Hund ist aufmerksam                                                                                                                         | my dog is attentive                                                                                              | Monash (T), PANAS (5R)                               |
| 59   | Mein Hund ist dominant                                                                                                                           | my dog is dominant                                                                                               | Monash (M)                                           |
| 60   | Mein Hund ist begierig, willig.                                                                                                                  | my dog is eager, willing.                                                                                        | Monash (E)                                           |
| 61   | Mein Hund ist leicht erregbar, "fährt schnell hoch", sei es durch positive oder negative Reize.                                                  | My dog is easily excitable be it through positive or negative stimuli.                                           | Monash (E), PANAS (7), I-Q (18)                      |
| 62   | Mein Hund ist freundlich, lieb.                                                                                                                  | my dog is friendly, nice                                                                                         | Monash (A), C-BFI (32)                               |
| 63   | Mein Hund ist fröhlich, lustig, sorglos, unbekümmert, immer gut drauf.                                                                           | my dog is happy, funny, carefree, happy-go-lucky, always in a good mood.                                         | Monash (A)                                           |
| R64  | Mein Hund ist fügsam.                                                                                                                            | my dog is biddable.                                                                                              | Monash (A)                                           |
| 65   | Mein Hund gehorcht im Allgemeinen gut.                                                                                                           | my dog generally obeys well.                                                                                     | Monash (T)                                           |
| 66   | Mein Hund ist eher hyperaktiv.                                                                                                                   | my dog is rather hyper active                                                                                    | Monash (E)                                           |
| 67   | Mein Hund ist intelligent                                                                                                                        | My dog is intelligent                                                                                            | HSC-Q (6,17), Monash (T)                             |
| 68   | Mein Hund ist neugierig, muss seine Nase überall hineinstecken.                                                                                  | my dog is curious, always has to poke his nose into everything.                                                  | Monash (M), C-BFI (10), I-Q (15)                     |
| 69   | Mein Hund hat eine sanfte Natur.                                                                                                                 | my dog is of a gentle nature.                                                                                    | Monash (A)                                           |
| R70  | Mein Hund ist selbstbewusst, selbständig, unabhängig.                                                                                            | my dog is confident, independent                                                                                 | Monash (M)                                           |
| 71   | Mein Hund ist gut trainierbar.                                                                                                                   | my dog is easily trainable                                                                                       | Monash (T), I-Q(10)                                  |
| 72   | Mein Hund ist häufig überschwänglich.                                                                                                            | my dog is often exuberant                                                                                        | Monash (E)                                           |
| 73   | Mein Hund ist eher unruhig.                                                                                                                      | My dog tends to be restless.                                                                                     | HSP-Q (11), Monash (E), PANAS (13R), C-BFI (9R, 21R) |
| 74   | Mein Hund ist ein Opportunist, er nützt Situationen gerne zu seinem Vorteil aus.                                                                 | my dog is an opportunist, he takes advante of situations.                                                        | Monash (M)                                           |
| 75a  | Mein Hund ist eher unsicher und/oder vorsichtig.                                                                                                 | My dog tends to be uncertain and/or careful.                                                                     | Monash (N), C-BFI (8R)                               |
| 76   | Mein Hund ist eher unterwürfig.                                                                                                                  | my dog is submissive                                                                                             | Monash (N)                                           |
| 77   | Mein Hund ist tendenziell ruhig                                                                                                                  | my dog tends to be calm                                                                                          | Monash (E)                                           |
| 78   | Mein Hund zeigt grossen Enthusiasmus, ist begeisterungsfähig, leidenschaftlich.                                                                  | my dog shows great enthusiasm, passionate                                                                        | Monash (E), C-BFI (16)                               |
| 79   | Mein Hund hat eine durchsetzungsfähige Persönlichkeit, ist entschlossen, eigenwillig, stur, hat einen starken Willen.                            | my dog has an assertive personality, is decisive, stubborn, headstrong, has a strong will.                       | Monash (M), PANAS (4,15), C-BFI (26,28,38), I-Q (8)  |
| R80  | Mein Hund ist generell entspannt und kann gut mit Stress umgehen.                                                                                | My dog is generally relaxed and copes well with stress                                                           | Monash (A), PANAS (13), C-BFI (9)                    |
| 81   | Mein Hund ist kontaktfreudig, gesellig.                                                                                                          | my dog is sociable                                                                                               | Monash (A), C-BFI (36)                               |
| 82   | Mein Hund macht Dinge gründlich.                                                                                                                 | my dog is conscientious.                                                                                         | HSC-Q (14), HSP-Q (12), Monash (M), C-BFI (34R)      |
| 83   | Mein Hund ist eher schüchtern, gehemmt, zurückhaltend.                                                                                           | My dog is rather shy, inhibited, cautious                                                                        | HSP-Q (27), Monash (N), C-BFI (31)                   |
| 84   | Mein Hund ist sensibel auf die Bedürfnisse und Gefühle anderer.                                                                                  | My dog is sensitive to needs and feelings of others.                                                             | HSC-Q (15), C-BFI (37)                               |
| 85   | Mein Hund wird schnell nervös oder ist häufig nervös.                                                                                            | My dog gets nervous quickly or is often nervous.                                                                 | Monash (N), C-BFI (39)                               |
| 86   | Mein Hund ist verlässlich, ich kann mich auf ihn/sie verlassen.                                                                                  | my dog is reliable, I can rely on him.                                                                           | Monash (T), C-BFI (13)                               |
| 87   | Mein Hund ist kann angespannt sein.                                                                                                              | my dog can be tense.                                                                                             | C-BFI (14)                                           |
| 88   | Mein Hund ist ist ausdauernd, hartnäckig, beharrlich, hält durch, bis die Arbeit fertig ist.                                                     | my dog is persistent, insistent, perseverant, keeps on going until the work is done.                             | Monash (M)                                           |
| R89  | Mein Hund ist bleibt ruhig in angespannten, lauten Situationen oder Situationen, in denen viel läuft.                                            | My dog stays calm in tense, loud situations or situations where a lot is going on.                               | HSC-Q (19), HSP-Q (5,19), PANAS (10), C-BFI (34)     |
| 90   | Mein Hund ist scheint häufig "down" oder deprimiert.                                                                                             | My dog often seems to be "down" or depressed.                                                                    | C-BFI (4)                                            |
| 91   | Mein Hund ist kann kühl und distanziert sein.                                                                                                    | My dog is aloof and distant.                                                                                     | C-BFI (27)                                           |
| 92   | Mein Hund ist ist ein Einzelgänger, eher distanziert, reserviert.                                                                                | My dog is a loner, rather distant and reserved.                                                                  | C-BFI (6)                                            |
| R93  | Mein Hund ist ist emotional stabil, d.h. meistens ausgeglichen und nicht schnell aus der Fassung zu bringen.                                     | My dog is emotionally stable, i.e. he is mostly even-tempered and not easily unnerved.                           | C-BFI (24)                                           |
| R94  | Mein Hund ist ist einfallslos.                                                                                                                   | my dog is unimaginative.                                                                                         | C-BFI (20)                                           |
| 95   | Mein Hund ist ist erfinderisch, kreativ, findet neue Wege, das zu erhalten, was er möchte, lässt sich neue Wege einfallen, Dinge zu machen.      | my dog is creative, inventive, finds new ways to get what he wants or to do things.                              | C-BFI (5)                                            |
| 96   | Mein Hund ist ist tendenziell faul, macht nicht mehr als er muss.                                                                                | my dog tends to be lazy, does not do more than he has to.                                                        | PANAS (14), C-BFI (23)                               |
| 97   | Mein Hund ist macht generell mit, wenn ich etwas von ihm will, er ist kooperativ, gibt viel.                                                     | my dog generally participates when I want something from him, he is cooperative, and gives a lot.                | C-BFI (41)                                           |
| 98   | Mein Hund ist kann launisch sein.                                                                                                                | my dog can be moody.                                                                                             | C-BFI (29)                                           |
| 99   | Mein Hund ist ist leicht durch Dinge abgelenkt.                                                                                                  | My dog is easily distracted.                                                                                     | C-BFI (42)                                           |
| 100  | Mein Hund ist ist lernwillig, lernt und macht gerne neue Dinge.                                                                                  | my dog is eager to learn, likes to learn and do new things.                                                      | C-BFI (35)                                           |
| 101  | Mein Hund ist scheint sich viele Sorgen zu machen.                                                                                               | My dog seems to worry a lot.                                                                                     | C-BFI (19)                                           |
| 102  | Mein Hund ist scheint nachdenklich                                                                                                               | My dog seems thoughtful.                                                                                         | C-BFI (15)                                           |
| 103  | Mein Hund ist wird schnell nervös oder ist häufig nervös.                                                                                        | My dog is nervous quickly or often.                                                                              | C-BFI (39)                                           |
| R104 | Mein Hund ist vertraut in der Regel schnell.                                                                                                     | My dog tends to trust quickly.                                                                                   | C-BFI (22)                                           |
| R105 | Mein Hund ist hat selten Angst                                                                                                                   | My dog is rarely frightened                                                                                      | Monash (NR), PANAS (1)                               |

|     | Questions German                                                                                                                                        | English translation of questions                                                                                  | Source     |
|-----|---------------------------------------------------------------------------------------------------------------------------------------------------------|-------------------------------------------------------------------------------------------------------------------|------------|
| 106 | Mein Hund ist wird sehr aufgeregt, wenn wir uns auf einen Spaziergang vorbereiten (z.B. wenn er die Leine sieht oder das Wort "Spaziergang" hört, etc.) | My dog gets very excited when we get ready for a walk (e.g. when he sees the lead or hears the word "walk", etc.) | PANAS (2)  |
| 107 | Mein Hund ist hat eine bestimmte Angst oder Phobie.                                                                                                     | My dog has a specific fear or phobia.                                                                             | PANAS (8)  |
| 108 | Mein Hund ist versucht, aus dem Garten auszubrechen.                                                                                                    | My dog tries to escape from the yard.                                                                             | PANAS (9)  |
| 109 | Mein Hund ist hat Angst vor Geräuschen im Fernsehen oder Radio.                                                                                         | My dog is afraid of noises in the tv or radio.                                                                    | PANAS (12) |
| 110 | Mein Hund ist hat Angst vor dem Staubsauger oder anderen alltäglichen Haushaltsgeräten.                                                                 | my dog is afraid of the vacuum cleaner or other everyday household devices.                                       | PANAS (16) |
| 111 | Mein Hund ist muss stark motiviert werden, um bei energieaufwändigen Aktivitäten mitzumachen.                                                           | My dog has to be strongly motivated to do something energy-consuming.                                             | PANAS (17) |
| 112 | Mein Hund ist bleibt frech, auch wenn ich ihn mehrfach zurechtweise.                                                                                    | My dog keeps on being cheeky even after being reprimanded repeatedly.                                             | PANAS (18) |

HSC-Q = Highly Sensitive Child Questionnaire [85], HSP-Q = Highly Sensitive Person Questionnaire [57], C-BFI = Canine Big Five Inventory [86],

PANAS = Positive and Negative Activation Score [79], I-Q = Impulsivity Questionnaire [77]

(number) = Question number in original questionnaire

Monash Questionnaire [78]: E = extraversion, M = motivation/self-assuredness, N = neuroticism, T = training focus, A = amicability

grey = Questions with significantly different mean scores between HSD and nHSD group

R = Questions with reversed scores
